# Supplementary material for: Catalytic pyrolysis for the production of refinery-ready biocrude oils from six different biomass sources
Source: Royal Society of Chemistry journal article supplement (doi:10.1039/c4gc00555d), 2014-01-01
Supplement: c4gc00555d1.pdf [file c4gc00555d1.pdf]

### Supplementary Materials

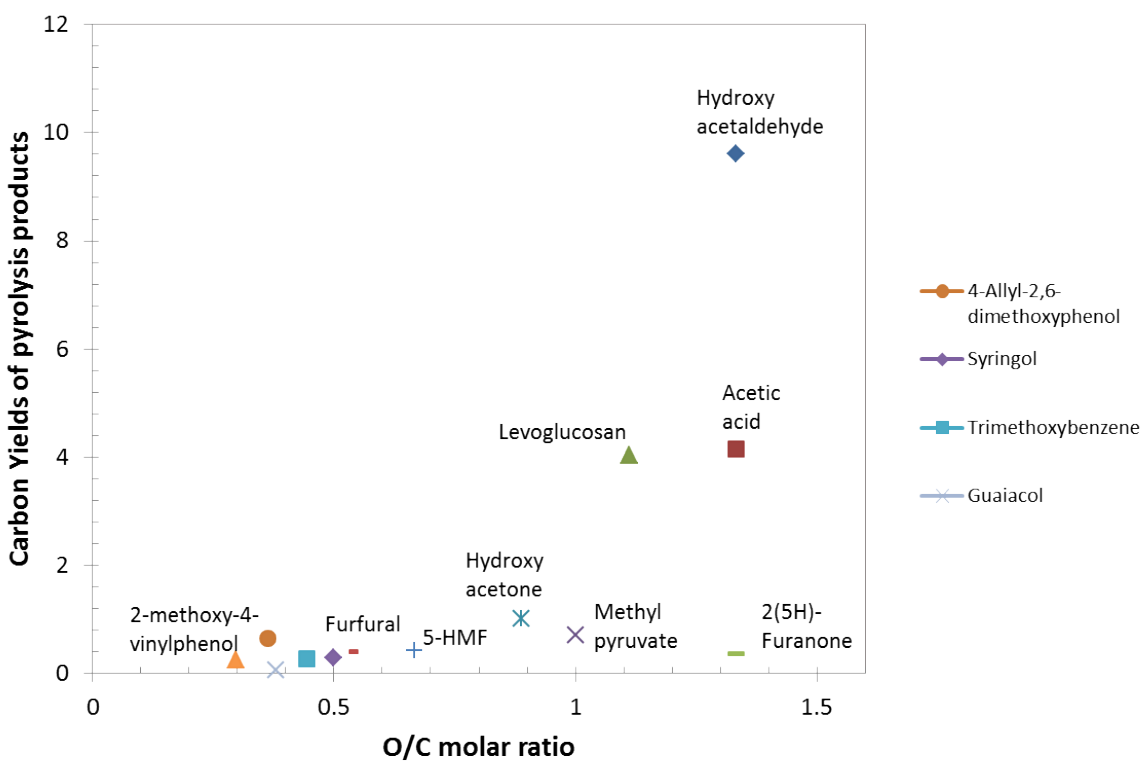

**Figure S1.** A plot of carbon yields versus O/C molar ratio showing the role of individual compounds from the hybrid poplar on the oxygenated nature pyrolysis oil.

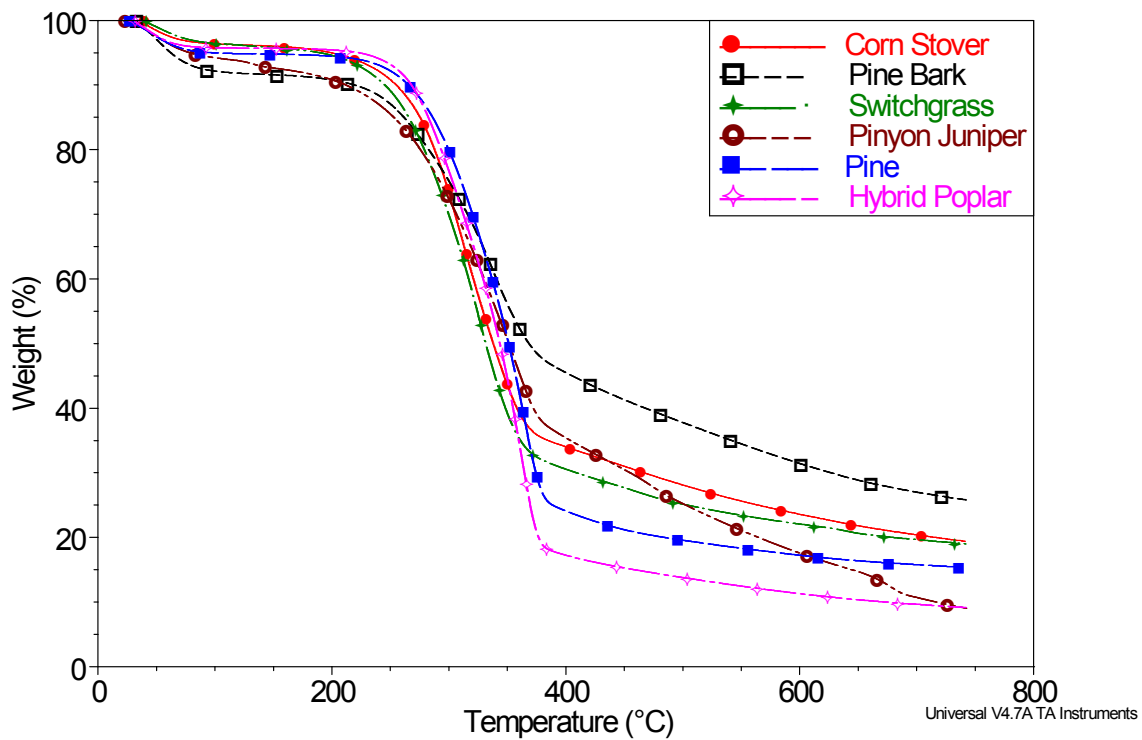

**Figure S2.** TG curves of corn stover, pine bark, switchgrass, pinyon-juniper, pine, and hybrid poplar

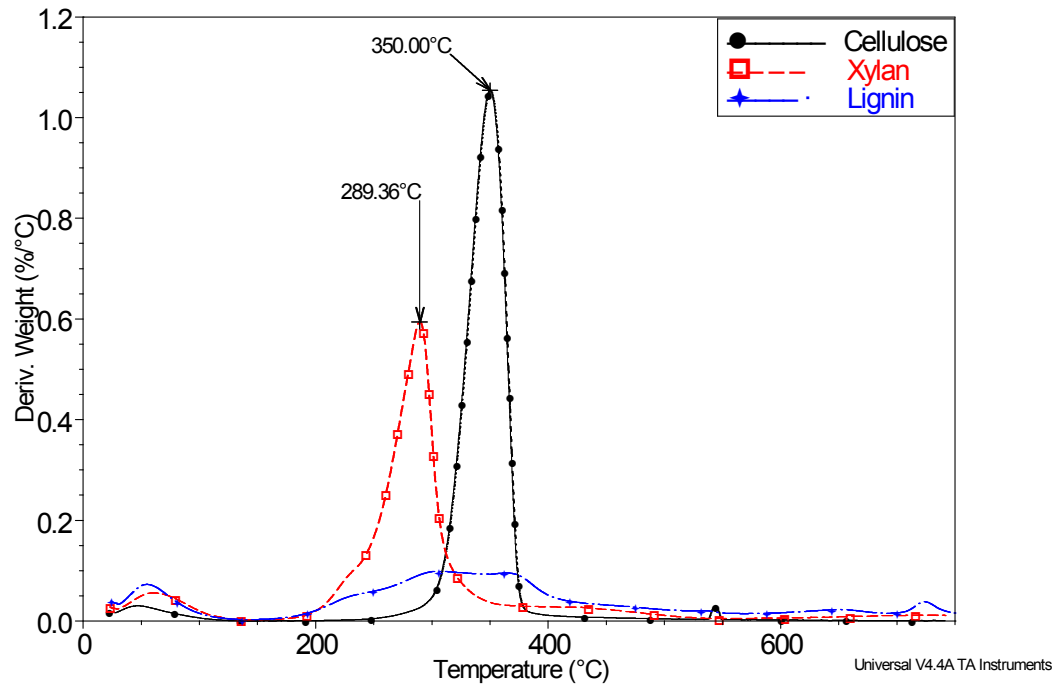

**Figure S3a.** DTG curves model biopolymer: xylan, cellulose and kraft lignin

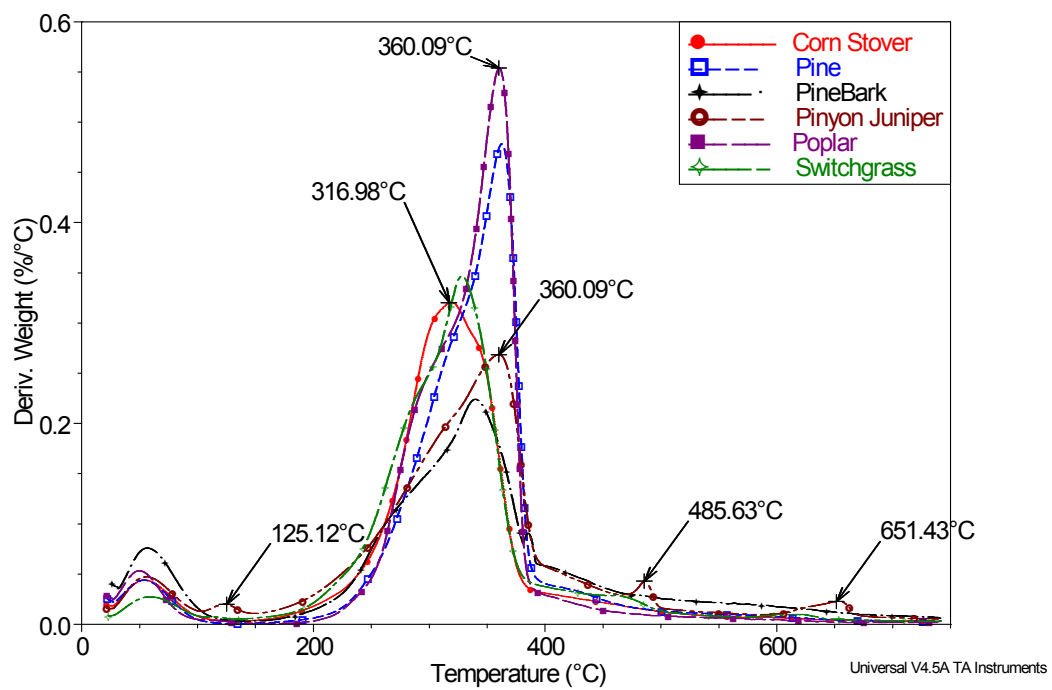

**Figure S3b.** DTG curves of corn stover, pine, pine bark, pinyon-juniper, poplar and switchgrass

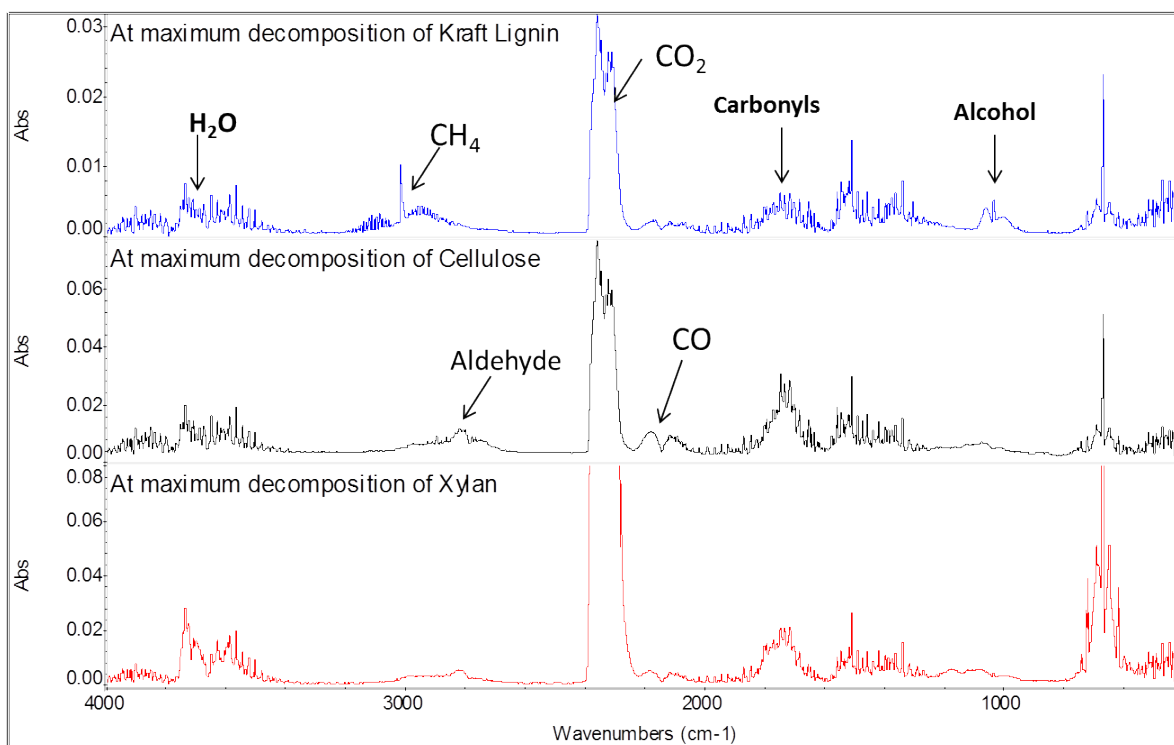

**Figure S4a.** FTIR spectra of evolved gases at the maximum rate of decomposition for xylan, microcrystalline cellulose and kraft lignin

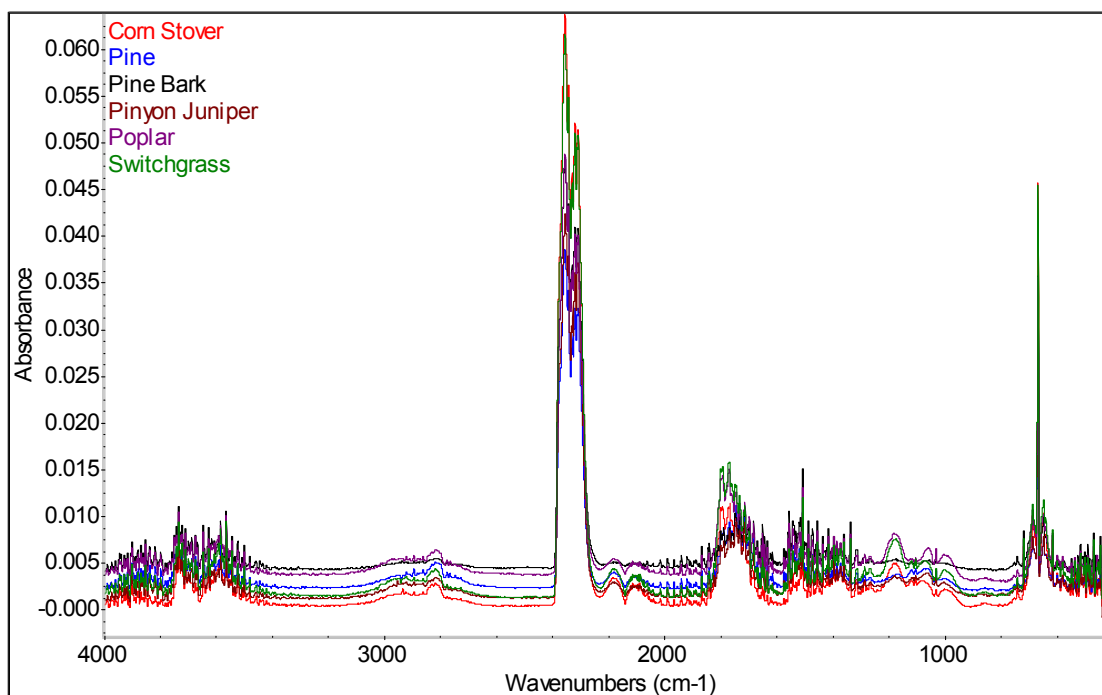

**Figure S4b.** FTIR spectra of evolved gases at 290°C from the thermal degradation of corn stover, pine, pine bark, pinyon-juniper, poplar and switchgrass

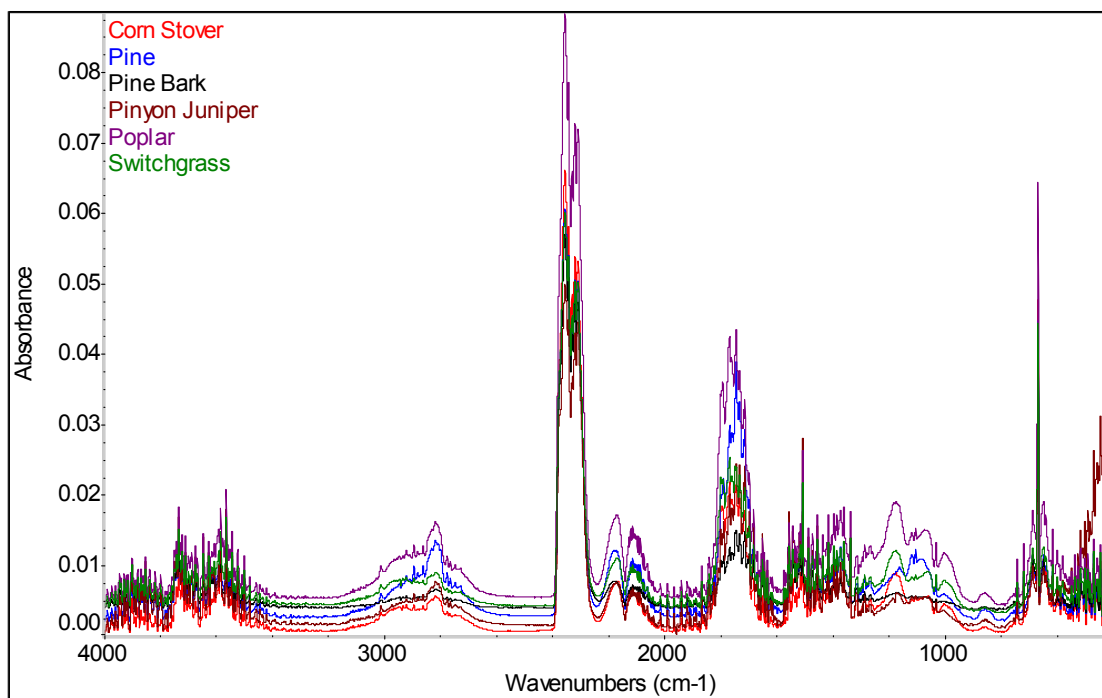

**Figure S4c.** FTIR spectra of evolved gases at 350 °C from the thermal degradation of corn stover, pine, pine bark, pinyon-juniper, poplar and switchgrass

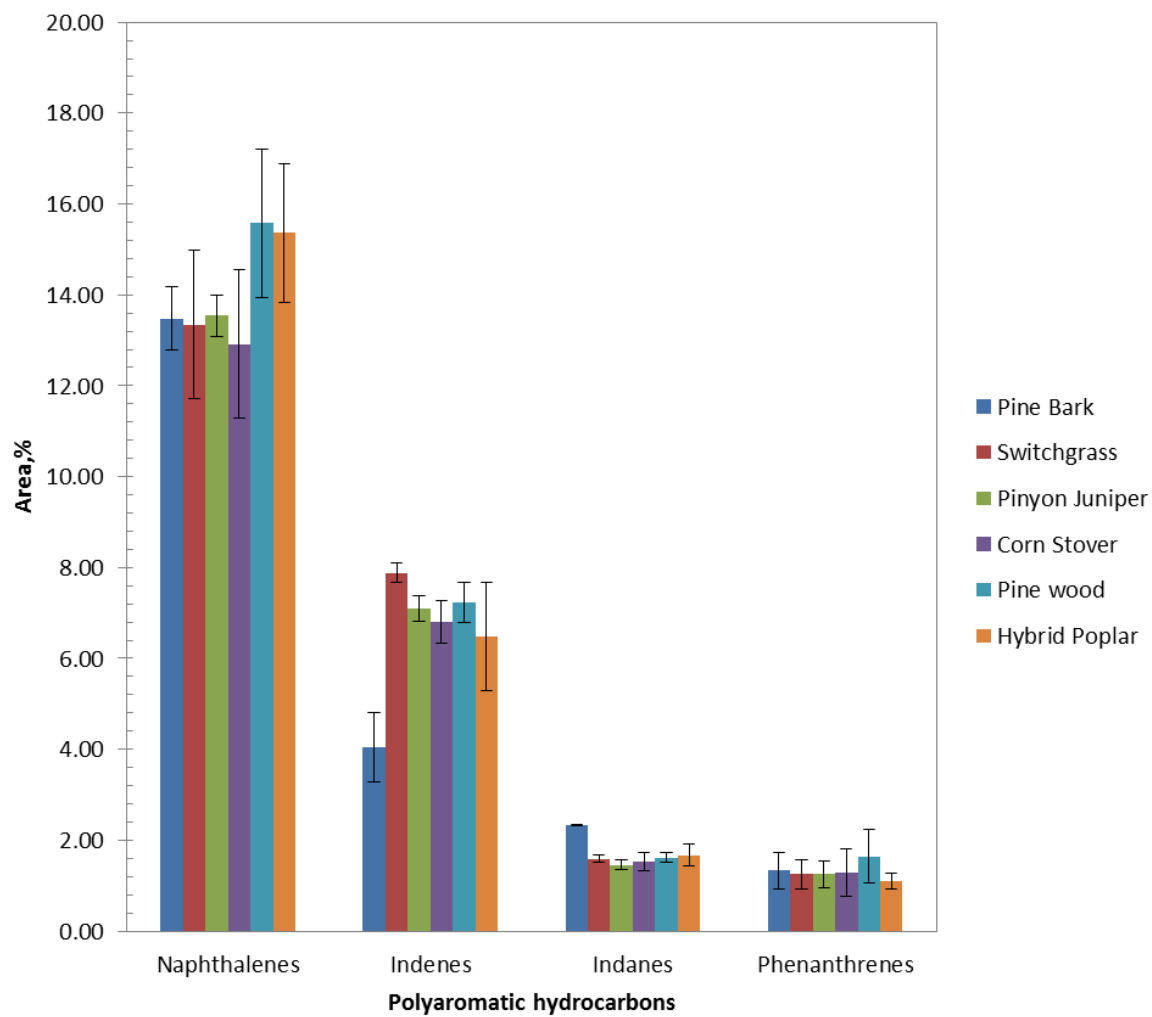

**Figure S5.** Comparison of polyaromatic hydrocarbons produced in the catalytic pyrolysis with ZSM- at 550 °C and C/F ratio of 10 (w/w)

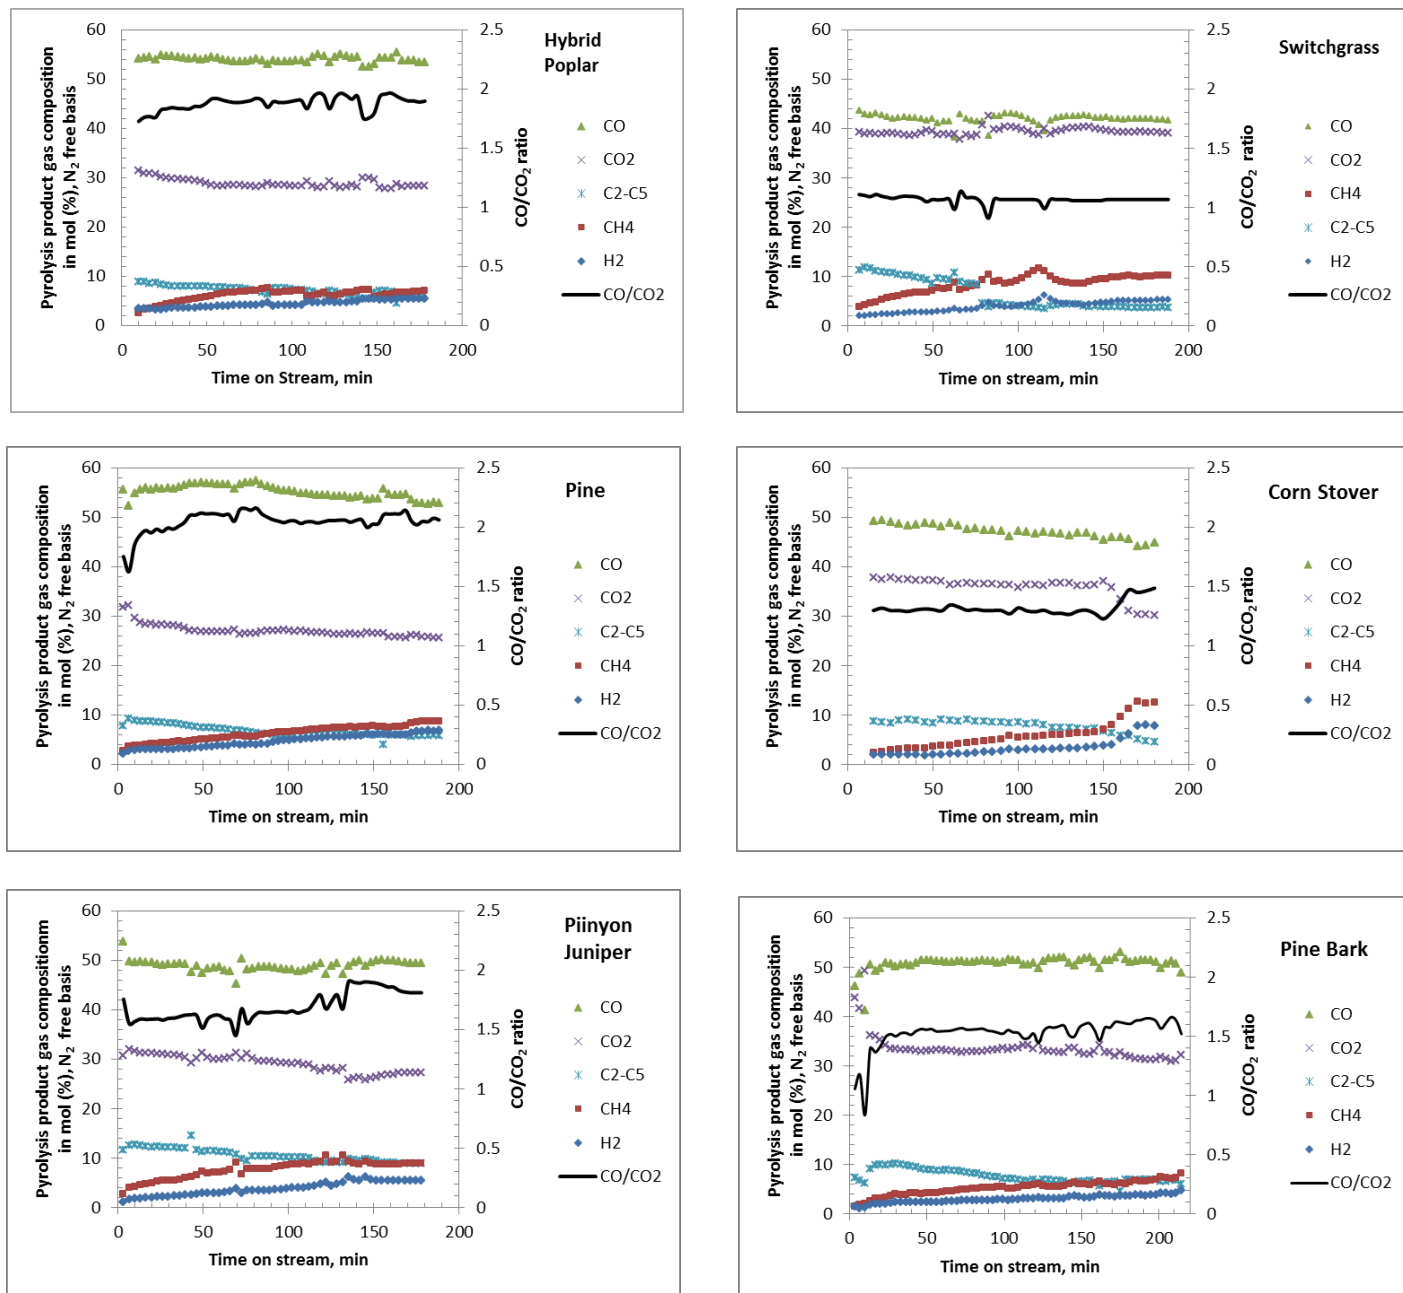

**Figure S6.** Gas evolution plot showing the composition of NCG produced from the various feedstocks sampled after the coalescing filter at time interval of 3.25 mins during the 3 hour run of catalytic pyrolysis experiments.

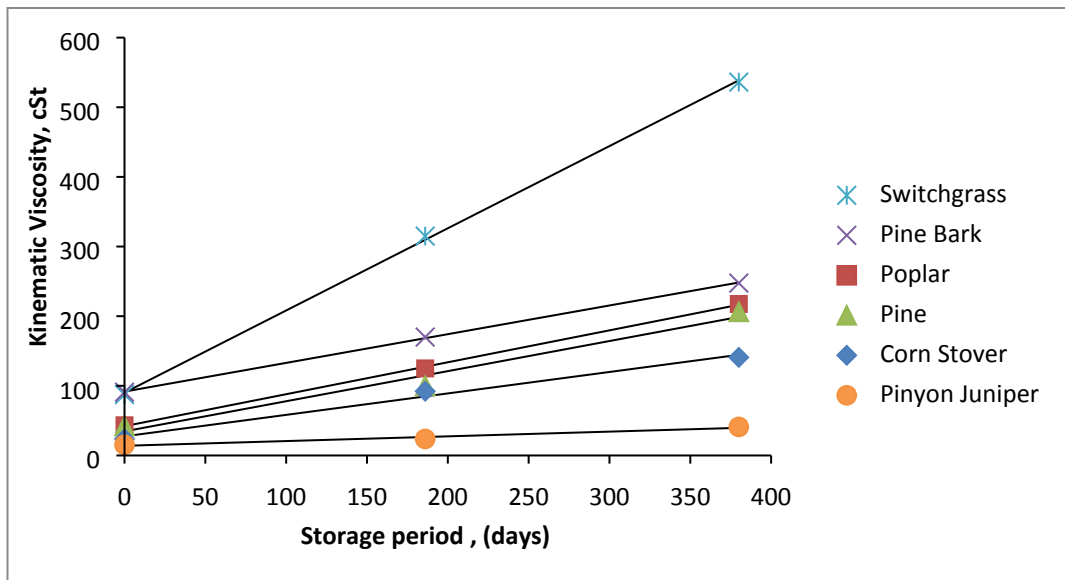

**Figure S7.** Storage stability curves showing the change in the viscosity of the various biocrude oils measured over a period of one year at a six month interval.



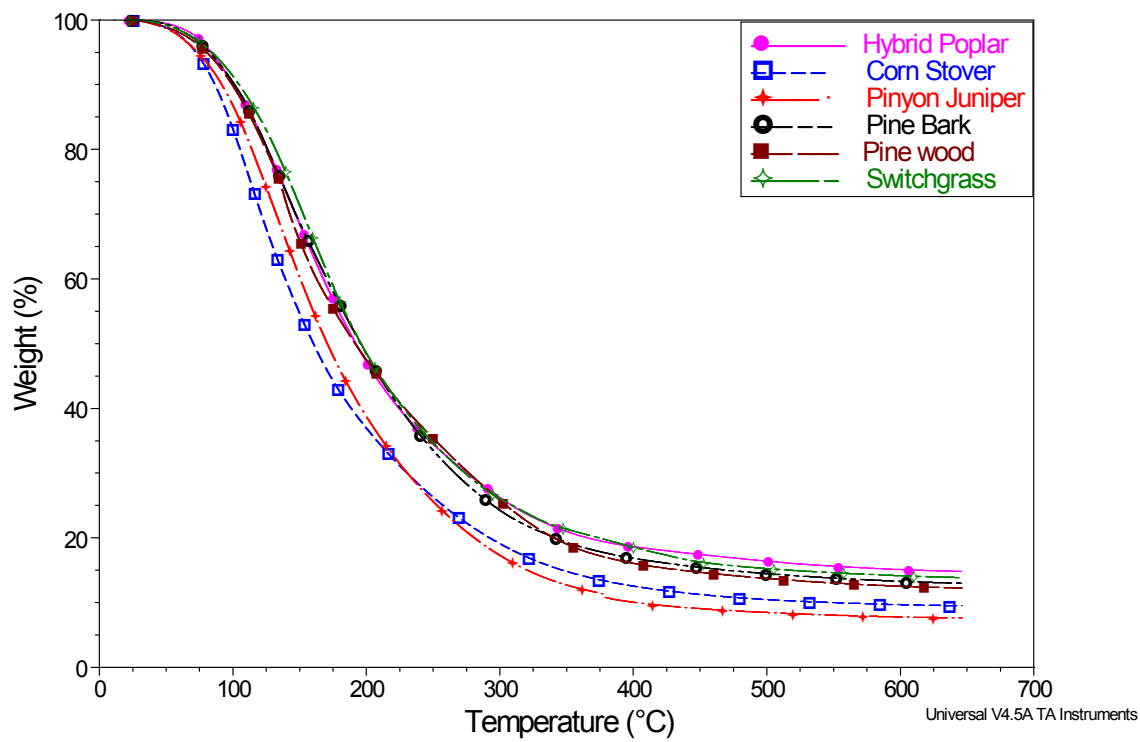

**Figure S8.** TG curves of biocrude oils from poplar, corn stover, pinyon-juniper, pine bark, pine and switchgrass.

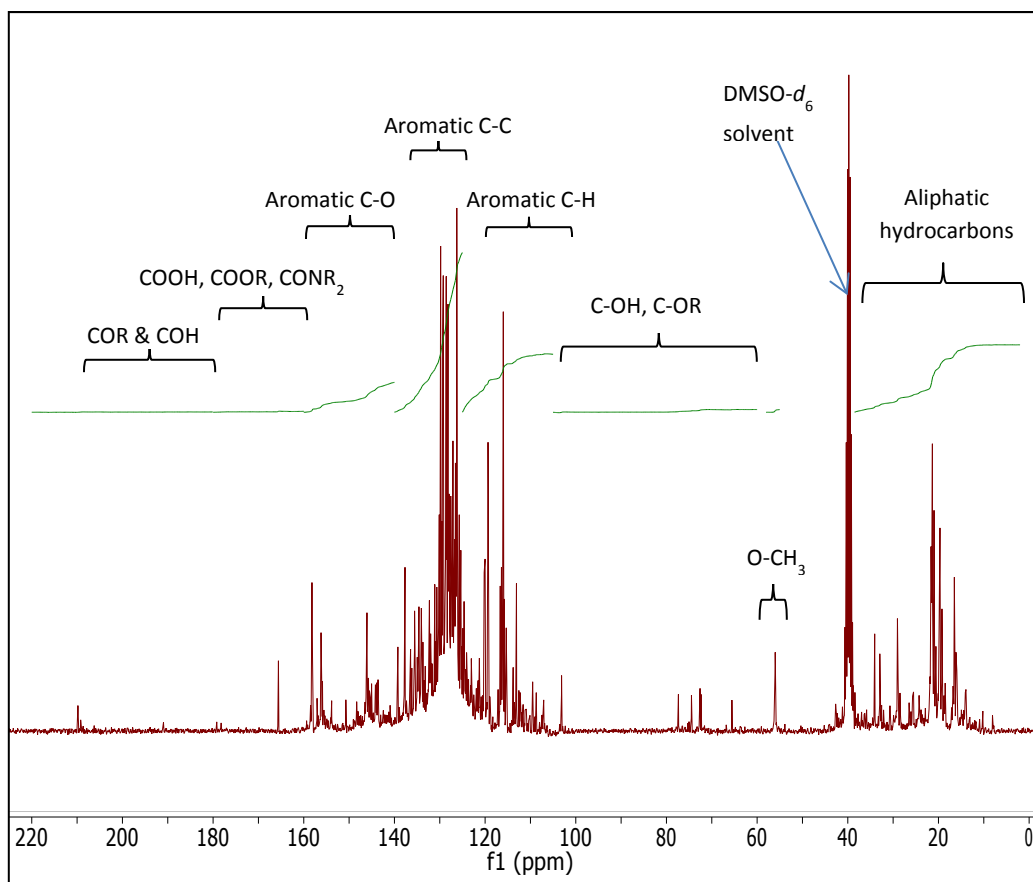

**Figure S9.**  $^{13}\text{C}$ -NMR spectrum of biocrude oil produced from pinyon juniper

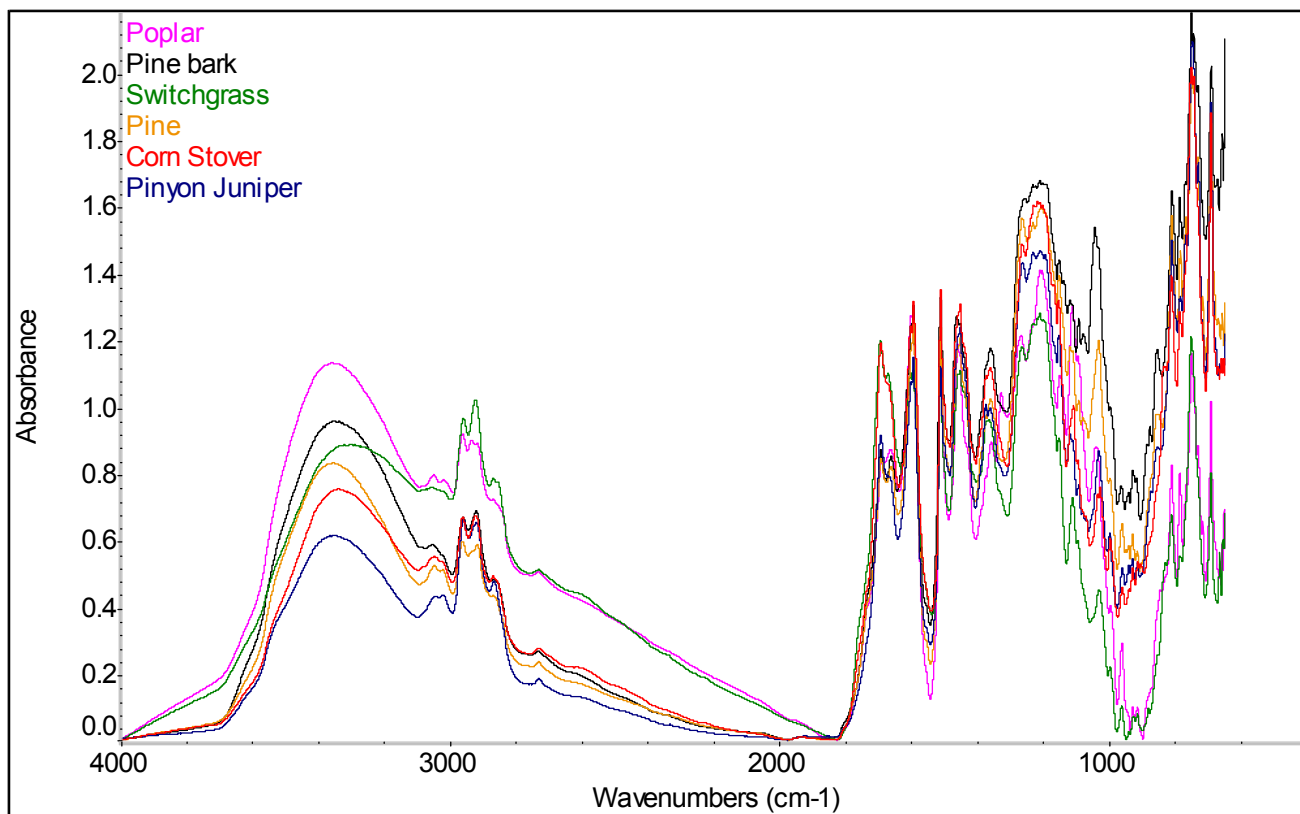

**Figure S10.** FT-IR spectra of biocrude oils from poplar, pine bark, switchgrass, pine, corn stover and pinyon juniper.

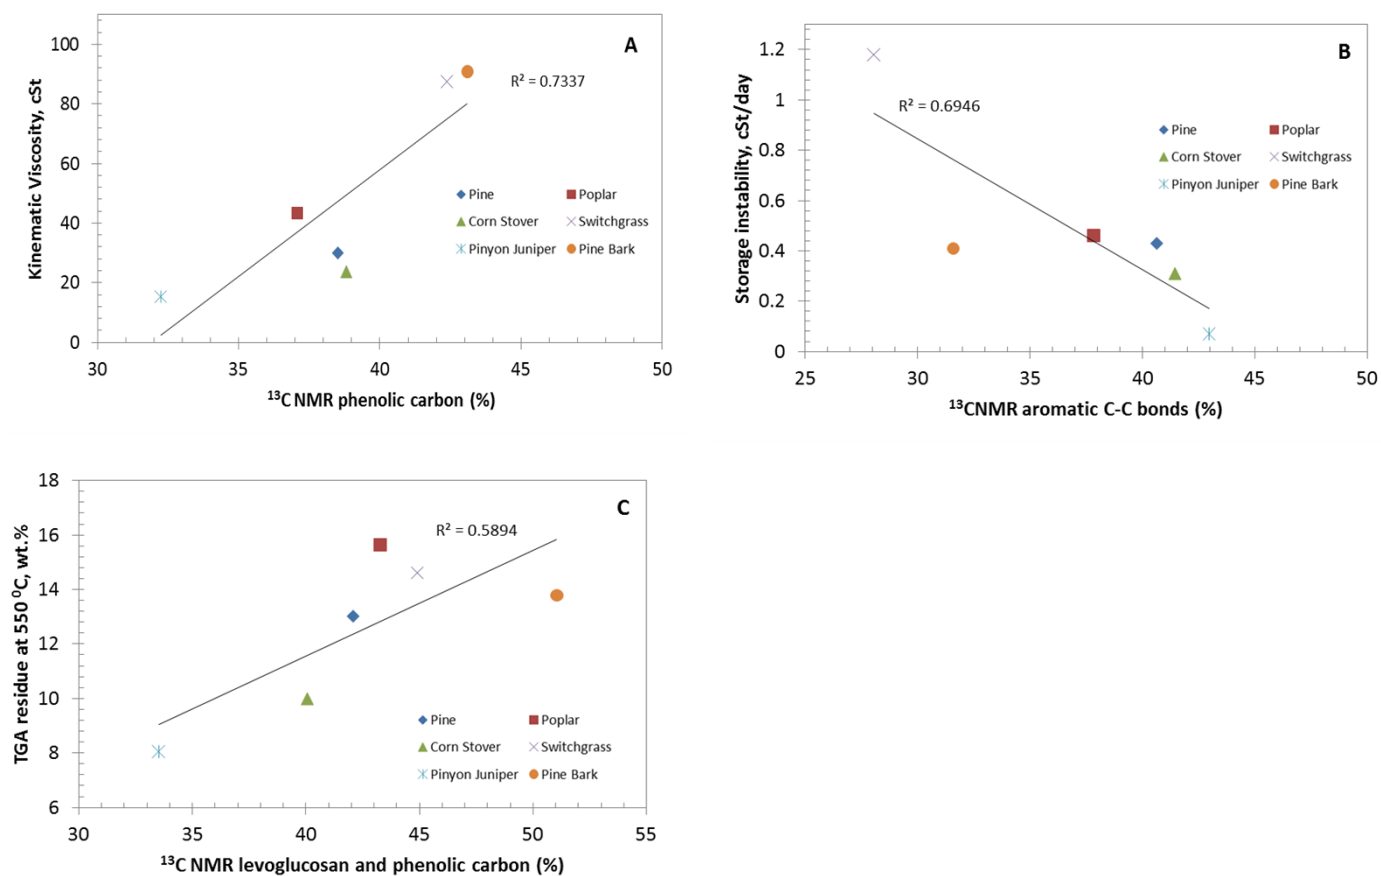

**Figure S11.** Correlation plots showing the relationship between the chemical composition of the biocrude oils and selected physical properties: (A) correlation between kinematic viscosity and phenolic carbons; (B) correlation between aromatic C-C bonds and storage stability; (C) correlation between levoglucosan/phenolics carbons and TGA solid residue.

**Table S1.** Comparison of the physico-chemical properties of raw bio-oil and upgraded bio-oils\*

| Analysis                                                                | Raw bio-oil | Upgraded<br>bio-oil A | Upgraded<br>bio-oil B |
|-------------------------------------------------------------------------|-------------|-----------------------|-----------------------|
| Elemental (Moisture free basis)                                         |             |                       |                       |
| C                                                                       | 60.67       | 81.83                 | 75.29                 |
| H                                                                       | 6.67        | 7.84                  | 6.87                  |
| O                                                                       | 32.94       | 9.83                  | 17.69                 |
| N                                                                       | < 0.5       | < 0.5                 | < 0.5                 |
| S                                                                       | < 0.5       | < 0.5                 | < 0.5                 |
| Ash                                                                     | < 0.08      | < 0.06                | < 0.07                |
| H/C molar ratio                                                         | 1.32        | 1.15                  | 1.09                  |
| O/C molar ratio                                                         | 0.41        | 0.10                  | 0.18                  |
| pH                                                                      | 2.60        | 4.05                  | 3.52                  |
| Density (g/cm <sup>3</sup> )                                            | 1.21        | 0.96                  | 1.06                  |
| Gravity, °API                                                           | -14.6       | 15.9                  | 2.0                   |
| Viscosity (at 40 °C, cSt)                                               | 285         | 4.90                  | 18.60                 |
| HHV (MJ/kg)                                                             | 24.48       | 36.87                 | 33.98                 |
| Karl Fischer moisture (wt.%)                                            | 2.95        | 0.83                  | 1.99                  |
| Thermal stability at 90 °C for 24 h<br>(Rate of viscosity change, cP/h) | 53.08       | 0.003                 | 0.364                 |
| Viscosity of 310 days stored oil (at 40 °C, cP)                         | N/A         | 5.15                  | 23.8                  |
| Distillate fractions, wt.%                                              |             |                       |                       |
| ≤ 220 °C                                                                | 51.20       | 91.23                 | N/A                   |
| ≤ 440 °C                                                                | -           | -                     | 76.37                 |

Adapted from Mante, O. and F. Agblevor <sup>2</sup>

**Table S2.** Elemental and ash analysis of the various biomass feedstocks

| <b>Elemental<br/>Composition (wt.%)<sup>d,b</sup></b> | <b>Biomass Feedstock</b> |       |                |             |                |              |
|-------------------------------------------------------|--------------------------|-------|----------------|-------------|----------------|--------------|
|                                                       | Poplar                   | Pine  | Pinyon-Juniper | Switchgrass | Corn<br>Stover | Pine<br>Bark |
| C                                                     | 50.31                    | 52.11 | 51.59          | 48.07       | 46.49          | 53.41        |
| H                                                     | 6.02                     | 5.03  | 5.33           | 5.028       | 5.30           | 4.88         |
| N                                                     | 0.02                     | 0.07  | 0.34           | 0.65        | 0.43           | 0.22         |
| O*                                                    | 43.18                    | 42.36 | 42.34          | 40.93       | 38.81          | 40.47        |
| Ash                                                   | 0.46                     | 0.43  | 0.40           | 5.32        | 8.97           | 1.02         |

[d.b]-dry basis, \*by difference

**Table S3.** Structural composition of various feedstocks from literature

| Reference Source sample ID        | Biomass Feedstock  | Cellulose | Hemicellulose | Lignin | Ash   | Reference |
|-----------------------------------|--------------------|-----------|---------------|--------|-------|-----------|
| 78-Switchgrass (Alamo)            | Switchgrass        | 33.03     | 26.51         | 17.63  | 5.21  | 70        |
|                                   |                    | 37.00*    | 29.00*        | 19.00* | 6.00* | 71        |
| 45-Corn Stover (Zea mays)         | Corn Stover        | 35.82     | 23.04         | 17.77  | 9.82  | 70        |
|                                   |                    | 38.00*    | 26.00         | 19.00  | 6.00  | 71        |
| Hybrid Poplar (DN-34)             | Hybrid Poplar      | 44.65     | 22.59         | 23.91  | 0.85  | 70        |
|                                   | Hybrid Poplar      | 40.80     | 19.21         | 27.17  | 0.43  |           |
| 153-Monterey Pine (Pinus Radiata) | Pine               | 41.7      | 20.5          | 25.9   | 0.3   | 70        |
|                                   | Loblolly pine bark | 23.1      | 14.1          | 43.5   | 1.1   | 68        |

\*Average values

**Table S4.**  $^{13}\text{C}$  NMR distribution of the various carbons in the biocrude oils (percentage carbon total)

| Type of carbon                                                               | Chemical<br>Shift, $\delta$<br>(ppm) | Biocrude oils |        |                |             |                   |              |
|------------------------------------------------------------------------------|--------------------------------------|---------------|--------|----------------|-------------|-------------------|--------------|
|                                                                              |                                      | Pine          | Poplar | Corn<br>Stover | Switchgrass | Pinyon<br>Juniper | Pine<br>Bark |
| Aliphatic C-C                                                                | 55-0                                 | 16.49         | 17.32  | 17.52          | 25.17       | 22.82             | 16.66        |
| Methoxy C (-OCH <sub>3</sub> ) in<br>lignin                                  | 57-55                                | 1.17          | 4.62   | 1.05           | 1.89        | 1.10              | 1.47         |
| Aliphatic C-O (including<br>levoglucosan)                                    | 103-60                               | 3.57          | 6.20   | 1.25           | 2.53        | 1.28              | 7.95         |
| Aromatic C-H                                                                 | 125-105                              | 27.36         | 21.83  | 28.59          | 29.01       | 21.17             | 29.56        |
| Aromatic C-C (carbons in<br>aromatic hydrocarbons<br>further from an O atom) | 140-125                              | 40.63         | 37.82  | 41.44          | 28.06       | 42.96             | 31.59        |
| Aromatic C-O                                                                 | 160-140                              | 10.11         | 10.62  | 8.67           | 10.88       | 9.97              | 12.07        |
| Carbonyl (carboxylic acids<br>and derivatives)                               | 180-160                              | 0.18          | 0.64   | 0.89           | 1.60        | 0.38              | 0.19         |
| Carbonyl (aldehydes,<br>ketones)                                             | 220-180                              | 0.49          | 0.96   | 0.59           | 0.86        | 0.33              | 0.51         |



**Table S5.** Pearson Correlation Coefficients

| Property                               | Carbons types determined by <sup>13</sup> CNMR |                  |                      |                            |             |              |              |              | Elemental    |             |
|----------------------------------------|------------------------------------------------|------------------|----------------------|----------------------------|-------------|--------------|--------------|--------------|--------------|-------------|
|                                        | Total C-C carbons                              | Phenolic Carbons | Levoglucosan Carbons | Phenolics and levoglucosan | Carbonyls   | Oxygenates   | Aromatic C-C | Aromatic C-O | C            | N           |
| pH                                     | 0.20                                           | 0.05             | -0.64                | -0.27                      | 0.56        | -0.20        | -0.31        | -0.22        | 0.70         | <b>0.90</b> |
| Density (g/cm <sup>3</sup> )           | <b>-0.93</b>                                   | 0.76             | <b>0.94</b>          | <b>0.95</b>                | 0.02        | <b>0.94</b>  | -0.62        | 0.77         | <b>-0.87</b> | -0.20       |
| Gravity, °API                          | <b>0.94</b>                                    | -0.76            | <b>-0.94</b>         | <b>-0.95</b>               | -0.04       | <b>-0.94</b> | 0.63         | -0.76        | <b>0.88</b>  | 0.19        |
| Kinematic Viscosity (at 40 °C, cSt)    | <b>-0.88</b>                                   | <b>0.86</b>      | 0.59                 | <b>0.85</b>                | 0.38        | <b>0.88</b>  | <b>-0.98</b> | <b>0.82</b>  | -0.47        | 0.43        |
| Dynamic Viscosity (at 40 °C, cP)       | <b>-0.89</b>                                   | <b>0.86</b>      | 0.61                 | <b>0.86</b>                | 0.36        | <b>0.89</b>  | <b>-0.97</b> | <b>0.83</b>  | -0.48        | 0.40        |
| Storage Stability                      | -0.54                                          | 0.64             | 0.05                 | 0.45                       | <b>0.82</b> | 0.54         | <b>-0.83</b> | 0.33         | -0.34        | 0.74        |
| TGA amount degraded below 400 °C, wt.% | 0.81                                           | -0.69            | -0.65                | -0.77                      | -0.48       | -0.81        | 0.72         | -0.60        | 0.88         | -0.13       |
| TGA residue at 550 °C, wt.%            | -0.81                                          | 0.66             | 0.70                 | 0.77                       | 0.43        | 0.81         | -0.68        | 0.61         | <b>-0.91</b> | 0.04        |

*Values in bold are different from 0 with a significance level  $\alpha=0.05$*
